# Supplementary material for: Effect of menopausal status on the survival and recurrence of sex-classified hepatocellular carcinoma after liver resection: a case-matched study with propensity score matching
Source: publisher site journal article supplement (doi:10.18632/aging.202155), 2020-11-21
Supplement: Supplementary file [file aging-v12i24-202155-supplementary-material-SD2.pdf]

## SUPPLEMENTARY TABLES

**Supplementary Table 1. Clinicopathological characteristics of all included HCC patients stratified by sex.**

| Features                                        | Male (n=780)         | Female (n=390)       | P-value          |
|-------------------------------------------------|----------------------|----------------------|------------------|
| Age (mean, Years)                               | 53.87(10.17)         | 54.25(11.04)         | 0.555            |
| Cigarette smoking (Yes/No)(%)                   | 151(19.4)/629(80.6)  | 8(2.1)/382(97.9)     | <b>&lt;0.001</b> |
| Alcohol consumption (Yes/No)(%)                 | 244(31.3)/536(68.7)  | 8(2.1)/382(97.9)     | <b>&lt;0.001</b> |
| Diabetes mellitus (Yes/No)(%)                   | 169(21.7)/611(78.3)  | 47(12.1)/343(87.9)   | <b>&lt;0.001</b> |
| Antiviral (Yes/No)(%)                           | 164(21.0)/616(79.0)  | 76(19.5)/314(80.5)   | 0.591            |
| Tbi(mean, $\mu$ mol/L)                          | 14.51(9.78)          | 14.51(24.13)         | 0.999            |
| Alb(mean, g/L)                                  | 41.25(3.92)          | 41.49(4.23)          | 0.335            |
| ALT(mean, U/L)                                  | 36.74(28.83)         | 34.74 (33.54)        | 0.291            |
| AST(mean, U/L)                                  | 36.71(28.37)         | 40.27(31.11)         | 0.051            |
| GGT(mean, U/L)                                  | 82.28(83.56)         | 60.27(69.64)         | <b>&lt;0.001</b> |
| ALP(mean, U/L)                                  | 90.90(45.83)         | 96.48(49.88)         | 0.057            |
| AFP(mean, ng/ml)                                | 471.09(1973.27)      | 518.95(1039.32)      | 0.654            |
| HBsAg(Positive/Negative)(%)                     | 695(89.1)/85(10.9)   | 340(87.2)/50 (12.8)  | 0.382            |
| HBV_DNA( $\geq$ 2000/ $<$ 2000 IU/ml)(%)        | 370(47.4)/410(52.6)  | 178(45.6)/212 (54.4) | 0.605            |
| Type of resection (Nonanatomical/anatomical)(%) | 413(52.9)/367 (47.1) | 200(51.3)/190 (48.7) | 0.634            |
| Surgical margin ( $<$ 1/ $\geq$ 1cm)(%)         | 346(44.4)/434(55.6)  | 164(42.1)/226 (57.9) | 0.492            |
| Hilar clamping time (mean, minutes)             | 15.38(8.54)          | 14.40(9.35)          | 0.071            |
| Tumor size(mean, cm)                            | 5.06(3.40)           | 4.76(3.28)           | 0.139            |
| Tumor Number ( $>$ 1/1)(%)                      | 77(9.9)/703 (90.1)   | 25(6.4)/365(93.6)    | 0.062            |
| Satellite nodules (presence/absence)(%)         | 96(12.3)/684 (87.7)  | 44(11.3)/346 (88.7)  | 0.679            |
| Cirrhosis(Yes/No)(%)                            | 499(64.0)/281(36.0)  | 253(64.9)/137(35.1)  | 0.812            |
| Edmondson-Steiner grade III-IV/I-II(%)          | 525(67.3)/255(32.7)  | 257(65.9) /133(34.1) | 0.677            |
| MVI (Yes/No)(%)                                 | 87(11.2)/693(88.8)   | 60(15.4)/330(84.6)   | <b>0.049</b>     |
| BCLC stage (A-B/0)(%)                           | 754(96.7)/26(3.3)    | 374(95.9)/16(4.1)    | 0.617            |

Bold values indicate statistical significance ( $P < 0.05$ ).  $P$  values male versus female cohort.

HCC, hepatocellular carcinoma; Tbi, total bilirubin; Alb, albumin; ALT, alanine transaminase; AST, aspartate aminotransferase; GGT,  $\gamma$ -glutamyl transferase; ALP, alkaline phosphatase; AFP indicates  $\alpha$ -fetoprotein; MVI, microvascular invasion; BCLC, Barcelona Clinic Liver Cancer.

**Supplementary Table 2. Univariate and multivariate analysis of OS and RFS in all HCC patients.**

| Features                                        | OS    |           |                  | RFS   |           |                  |
|-------------------------------------------------|-------|-----------|------------------|-------|-----------|------------------|
|                                                 | HR    | 95%CI     | P-value          | HR    | 95%CI     | P-value          |
| <b>Univariate analysis</b>                      |       |           |                  |       |           |                  |
| Sex(Male/Female)                                | 0.750 | 0.61-0.93 | <b>0.007</b>     | 0.800 | 0.68-0.95 | <b>0.010</b>     |
| Age (mean, Years)                               | 1.000 | 0.99-1.01 | 0.455            | 1.000 | 0.99-1.01 | 0.727            |
| Cigarette smoking (Yes/No)(%)                   | 1.170 | 0.91-1.51 | 0.216            | 1.040 | 0.84-1.3  | 0.699            |
| Alcohol consumption (Yes/No)(%)                 | 1.040 | 0.84-1.3  | 0.725            | 1.010 | 0.84-1.22 | 0.921            |
| Diabetes mellitus (Yes/No)(%)                   | 0.950 | 0.75-1.21 | 0.694            | 1.150 | 0.95-1.4  | 0.161            |
| Antiviral (Yes/No)(%)                           | 0.800 | 0.63-1.02 | 0.072            | 0.820 | 0.67-1.01 | 0.057            |
| Tbi(mean, $\mu$ mol/L)                          | 1.010 | 1-1.01    | <b>&lt;0.001</b> | 1.000 | 0.99-1.01 | 0.921            |
| Alb(mean, g/L)                                  | 0.950 | 0.93-0.97 | <b>&lt;0.001</b> | 0.950 | 0.94-0.97 | <b>&lt;0.001</b> |
| ALT(mean, U/L)                                  | 1.000 | 1-1.01    | <b>0.030</b>     | 1.000 | 1-1.00    | 0.063            |
| AST(mean, U/L)                                  | 1.000 | 1-1.01    | <b>&lt;0.001</b> | 1.000 | 1-1.01    | <b>&lt;0.001</b> |
| GGT(mean, U/L)                                  | 1.000 | 1-1.00    | <b>&lt;0.001</b> | 1.000 | 1-1.00    | <b>&lt;0.001</b> |
| ALP(mean, U/L)                                  | 1.010 | 1-1.01    | <b>&lt;0.001</b> | 1.000 | 1-1.01    | <b>&lt;0.001</b> |
| AFP(mean, ng/ml)                                | 1.000 | 1-1.00    | <b>0.001</b>     | 1.000 | 1-1.00    | 0.165            |
| HBsAg(Positive/Negative)(%)                     | 0.980 | 0.74-1.3  | 0.886            | 1.160 | 0.91-1.49 | 0.234            |
| HBV_DNA( $\geq$ 2000/ $<$ 2000 IU/ml)(%)        | 1.340 | 1.11-1.61 | <b>0.002</b>     | 1.360 | 1.16-1.58 | <b>&lt;0.001</b> |
| Type of resection (Nonanatomical/anatomical)(%) | 1.230 | 1.02-1.48 | <b>0.029</b>     | 1.080 | 0.93-1.26 | 0.330            |
| Surgical margin ( $<$ 1/ $\geq$ 1cm)(%)         | 1.020 | 0.84-1.22 | 0.870            | 1.090 | 0.94-1.27 | 0.266            |
| Hilar clamping time (mean, minutes)             | 1.010 | 1-1.02    | 0.181            | 1.010 | 1-1.02    | <b>0.014</b>     |
| Tumor size(mean, cm)                            | 1.110 | 1.09-1.14 | <b>&lt;0.001</b> | 1.090 | 1.07-1.11 | <b>&lt;0.001</b> |
| Tumor Number ( $>$ 1/1)(%)                      | 1.530 | 1.14-2.06 | <b>0.004</b>     | 1.660 | 1.29-2.14 | <b>&lt;0.001</b> |
| Satellite nodules (presence/absence)(%)         | 1.930 | 1.5-2.49  | <b>&lt;0.001</b> | 1.970 | 1.58-2.46 | <b>&lt;0.001</b> |
| Cirrhosis(Yes/No)(%)                            | 1.380 | 1.13-1.68 | <b>0.002</b>     | 1.280 | 1.09-1.51 | <b>0.003</b>     |
| Edmondson-Steiner grade III-IV/I-II(%)          | 2.550 | 2.04-3.19 | <b>&lt;0.001</b> | 1.660 | 1.4-1.96  | <b>&lt;0.001</b> |
| MVI (Yes/No)(%)                                 | 2.040 | 1.6-2.6   | <b>&lt;0.001</b> | 1.790 | 1.44-2.22 | <b>&lt;0.001</b> |
| <b>Multivariate analysis</b>                    |       |           |                  |       |           |                  |
| Sex(Male/Female)                                |       |           |                  | 0.810 | 0.68-0.96 | <b>0.016</b>     |
| HBV_DNA( $\geq$ 2000/ $<$ 2000 IU/ml)(%)        |       |           |                  | 1.220 | 1.04-1.44 | <b>0.013</b>     |
| Tumor size(mean, cm)                            | 1.090 | 1.06-1.12 | <b>&lt;0.001</b> | 1.070 | 1.04-1.09 | <b>&lt;0.001</b> |
| Satellite nodules (presence/absence)(%)         | 2.230 | 1.36-3.67 | <b>0.002</b>     | 2.260 | 1.47-3.48 | <b>&lt;0.001</b> |
| Cirrhosis(Yes/No)(%)                            | 1.400 | 1.13-1.72 | <b>0.002</b>     | 1.260 | 1.07-1.5  | <b>0.007</b>     |
| Edmondson-Steiner grade III-IV/I-II(%)          | 2.330 | 1.86-2.93 | <b>&lt;0.001</b> | 1.550 | 1.3-1.84  | <b>&lt;0.001</b> |
| MVI (Yes/No)(%)                                 | 1.500 | 1.12-2.01 | <b>0.006</b>     | 1.380 | 1.08-1.76 | <b>0.009</b>     |

Bold values indicate statistical significance ( $P < 0.05$ ).

HCC, hepatocellular carcinoma; Tbi, total bilirubin; Alb, albumin; ALT, alanine transaminase; AST, aspartate aminotransferase; GGT,  $\gamma$ -glutamyl transferase; ALP, alkaline phosphatase; AFP indicates  $\alpha$ -fetoprotein; MVI, microvascular invasion; BCLC, Barcelona Clinic Liver Cancer; OS, overall survival; RFS, recurrence-free survival; CI, confidence interval; HR, hazard ratio.

**Supplementary Table 3. Comparison of clinicopathological characteristics between postmenopausal females and their matched male patients.**

| <b>Features</b>                                 | <b>Male (n=442)</b>     | <b>Female (n=221)</b> | <b>P-value</b>   |
|-------------------------------------------------|-------------------------|-----------------------|------------------|
| Age (mean, Years)                               | 61.09(5.55)             | 62.09 (5.81)          | <b>0.032</b>     |
| Cigarette smoking (Yes/No)(%)                   | 47(10.6)/395(89.4)      | 4(1.8)/217(98.2)      | <b>&lt;0.001</b> |
| Alcohol consumption (Yes/No)(%)                 | 120 ( 27.1)/322 ( 72.9) | 6(2.7)/215 ( 97.3)    | <b>&lt;0.001</b> |
| Diabetes mellitus (Yes/No)(%)                   | 156(35.3)/286(64.7)     | 31(14.0)/190(86.0)    | <b>&lt;0.001</b> |
| Antiviral (Yes/No)(%)                           | 84(19.0)/358 ( 81.0)    | 43(19.5)/178 ( 80.5)  | 0.972            |
| Tbi(mean, $\mu$ mol/L)                          | 15.33(10.35)            | 15.77(31.67)          | 0.789            |
| Alb(mean, g/L)                                  | 41.11(3.92)             | 41.22(4.33)           | 0.757            |
| ALT(mean, U/L)                                  | 34.07(23.63)            | 33.08(23.44)          | 0.609            |
| AST(mean, U/L)                                  | 35.96(30.03)            | 39.89(24.29)          | 0.092            |
| GGT(mean, U/L)                                  | 79.58(83.38)            | 51.23(40.54)          | <b>&lt;0.001</b> |
| ALP(mean, U/L)                                  | 91.75(48.34)            | 100.30(42.44)         | <b>0.026</b>     |
| AFP(mean, ng/ml)                                | 427.58(2199.92)         | 427.67 (947.55)       | 1.000            |
| HBsAg(Positive/Negative)(%)                     | 384(86.9)/58(13.1)      | 187(84.6)/34(15.4)    | 0.500            |
| HBV_DNA( $\geq$ 2000/ $<$ 2000 IU/ml)(%)        | 212(48.0)/230(52.0)     | 98(44.3)/123 ( 55.7)  | 0.425            |
| Type of resection (Nonanatomical/anatomical)(%) | 237(53.6)/205(46.4)     | 111(50.2)/110 ( 49.8) | 0.458            |
| Surgical margin ( $<$ 1/ $\geq$ 1cm)(%)         | 206(46.6)/236(53.4)     | 89(40.3)/132(59.7)    | 0.143            |
| Hilar clamping time (mean, minites)             | 14.66(7.89)             | 13.34(7.49)           | <b>0.040</b>     |
| Tumor size(mean, cm)                            | 4.77(3.06)              | 4.33(2.51)            | 0.066            |
| Tumor Number ( $>$ 1/1)(%)                      | 50(11.3)/392(88.7)      | 15(6.8)/206(93.2)     | 0.088            |
| Satellite nodules (presence/absence)(%)         | 50(11.3)/392(88.7)      | 15(6.8)/206(93.2)     | 0.088            |
| Cirrhosis(Yes/No)(%)                            | 270(61.1)/172(38.9)     | 155(70.1)/66(29.9)    | <b>0.028</b>     |
| Edmondson-Steiner grade III-IV/I-II(%)          | 284(64.3)/158(35.7)     | 154(69.7)/67 ( 30.3)  | 0.192            |
| MVI (Yes/No)(%)                                 | 40(9.0)/402(91.0)       | 32(14.5)/189 ( 85.5)  | <b>0.047</b>     |
| BCLC stage ( A-B/0)(%)                          | 429(97.1)/13(2.9)       | 215(97.3)/6(2.7)      | 1.000            |

Bold values indicate statistical significance ( $P < 0.05$ ).  $P$  values male versus female cohort.

HCC, hepatocellular carcinoma; Tbi, total bilirubin; Alb, albumin; ALT, alanine transaminase; AST, aspartate aminotransferase; GGT,  $\gamma$ -glutamyl transferase; ALP, alkaline phosphatase; AFP indicates  $\alpha$ -fetoprotein; MVI, microvascular invasion; BCLC, Barcelona Clinic Liver Cancer.

**Supplementary Table 4. Univariate and multivariate analysis of OS and RFS in the postmenopausal group matched with male HCC patients after PSM.**

| Features                                        | OS    |           |                  | RFS   |           |                  |
|-------------------------------------------------|-------|-----------|------------------|-------|-----------|------------------|
|                                                 | HR    | 95%CI     | P-value          | HR    | 95%CI     | P-value          |
| <b>Univariate analysis</b>                      |       |           |                  |       |           |                  |
| Sex(Male/Female)                                | 0.830 | 0.63-1.08 | 0.155            | 0.890 | 0.72-1.1  | 0.266            |
| Age (mean, Years)                               | 1.010 | 0.99-1.03 | 0.484            | 0.980 | 0.97-1    | 0.094            |
| Cigarette smoking (Yes/No)(%)                   | 1.040 | 0.67-1.63 | 0.861            | 1.140 | 0.8-1.63  | 0.481            |
| Alcohol consumption (Yes/No)(%)                 | 0.790 | 0.57-1.1  | 0.164            | 0.860 | 0.66-1.12 | 0.262            |
| Diabetes mellitus (Yes/No)(%)                   | 1.040 | 0.8-1.37  | 0.760            | 1.100 | 0.88-1.37 | 0.421            |
| Antiviral (Yes/No)(%)                           | 0.720 | 0.51-1.02 | 0.066            | 0.900 | 0.69-1.18 | 0.451            |
| Tbi(mean, $\mu$ mol/L)                          | 1.010 | 1.01-1.02 | <b>&lt;0.001</b> | 1.000 | 0.99-1.02 | 0.589            |
| Alb(mean, g/L)                                  | 0.930 | 0.91-0.96 | <b>&lt;0.001</b> | 0.950 | 0.93-0.97 | <b>&lt;0.001</b> |
| ALT(mean, U/L)                                  | 1.000 | 1-1.01    | 0.071            | 1.000 | 1-1.01    | <b>0.049</b>     |
| AST(mean, U/L)                                  | 1.000 | 1-1.01    | <b>0.001</b>     | 1.000 | 1-1.01    | <b>0.003</b>     |
| GGT(mean, U/L)                                  | 1.000 | 1-1.00    | <b>&lt;0.001</b> | 1.000 | 1-1.00    | <b>&lt;0.001</b> |
| ALP(mean, U/L)                                  | 1.010 | 1-1.01    | <b>&lt;0.001</b> | 1.000 | 1-1.01    | <b>&lt;0.001</b> |
| AFP(mean, ng/ml)                                | 1.000 | 1-1.00    | <b>0.002</b>     | 1.000 | 1-1.00    | 0.063            |
| HBsAg(Positive/Negative)(%)                     | 0.790 | 0.57-1.1  | 0.169            | 1.060 | 0.79-1.42 | 0.717            |
| HBV_DNA( $\geq$ 2000/ $<$ 2000 IU/ml)(%)        | 1.160 | 0.91-1.48 | 0.222            | 1.310 | 1.08-1.6  | <b>0.007</b>     |
| Type of resection (Nonanatomical/anatomical)(%) | 1.270 | 0.99-1.62 | 0.059            | 1.080 | 0.88-1.31 | 0.477            |
| Surgical margin ( $<$ 1/ $\geq$ 1cm)(%)         | 0.930 | 0.73-1.19 | 0.571            | 1.010 | 0.82-1.23 | 0.953            |
| Hilar clamping time (mean, minutes)             | 1.000 | 0.99-1.02 | 0.674            | 1.010 | 0.99-1.02 | 0.263            |
| Tumor size(mean, cm)                            | 1.130 | 1.09-1.17 | <b>&lt;0.001</b> | 1.090 | 1.06-1.13 | <b>&lt;0.001</b> |
| Tumor Number ( $>$ 1/1)(%)                      | 1.650 | 1.15-2.38 | <b>0.007</b>     | 1.600 | 1.16-2.22 | <b>0.004</b>     |
| Satellite nodules (presence/absence)(%)         | 1.650 | 1.15-2.38 | <b>0.007</b>     | 1.600 | 1.16-2.22 | <b>0.004</b>     |
| Cirrhosis(Yes/No)(%)                            | 1.710 | 1.3-2.25  | <b>&lt;0.001</b> | 1.490 | 1.2-1.84  | <b>&lt;0.001</b> |
| Edmondson-Steiner grade III-IV/I-II(%)          | 2.690 | 1.99-3.62 | <b>&lt;0.001</b> | 1.650 | 1.33-2.06 | <b>&lt;0.001</b> |
| MVI (Yes/No)(%)                                 | 1.690 | 1.19-2.38 | <b>0.003</b>     | 1.730 | 1.29-2.32 | <b>&lt;0.001</b> |
| <b>Multivariate analysis</b>                    |       |           |                  |       |           |                  |
| Tbi(mean, $\mu$ mol/L)                          | 1.010 | 1-1.01    | <b>0.001</b>     |       |           |                  |
| Alb(mean, g/L)                                  | 0.960 | 0.93-1    | <b>0.032</b>     |       |           |                  |
| Tumor size(mean, cm)                            | 1.160 | 1.11-1.21 | <b>&lt;0.001</b> | 1.100 | 1.06-1.14 | <b>&lt;0.001</b> |
| Tumor Number ( $>$ 1/1)(%)                      | 1.750 | 1.2-2.55  | <b>0.004</b>     | 1.530 | 1.09-2.14 | <b>0.014</b>     |
| Cirrhosis(Yes/No)(%)                            | 1.860 | 1.39-2.5  | <b>&lt;0.001</b> | 1.430 | 1.14-1.79 | <b>0.002</b>     |
| Edmondson-Steiner grade III-IV/I-II(%)          | 2.630 | 1.94-3.56 | <b>&lt;0.001</b> | 1.640 | 1.31-2.05 | <b>&lt;0.001</b> |

Bold values indicate statistical significance ( $P < 0.05$ ).

HCC, hepatocellular carcinoma; Tbi, total bilirubin; Alb, albumin; ALT, alanine transaminase; AST, aspartate aminotransferase; GGT,  $\gamma$ -glutamyl transferase; ALP, alkaline phosphatase; AFP indicates  $\alpha$ -fetoprotein; MVI, microvascular invasion; BCLC, Barcelona Clinic Liver Cancer; OS, overall survival; RFS, recurrence-free survival; CI, confidence interval; HR, hazard ratio.

**Supplementary Table 5. Comparison of clinicopathological characteristics between intermediate group and matched male patients with HCC after PSM.**

| <b>Features</b>                                 | <b>Male (n=192)</b>    | <b>Female (n=96)</b> | <b>P-value</b>   |
|-------------------------------------------------|------------------------|----------------------|------------------|
| Age (mean, Years)                               | 48.94 (2.81)           | 48.95(2.91)          | 0.977            |
| Cigarette smoking (Yes/No)(%)                   | 29(15.1)/163 (84.9)    | 2(2.1)/94(97.9)      | <b>0.002</b>     |
| Alcohol consumption (Yes/No)(%)                 | 41(21.4)/151(78.6)     | 0(0.0)/96(100.0)     | <b>&lt;0.001</b> |
| Diabetes mellitus (Yes/No)(%)                   | 7(3.6)/185(96.4)       | 9(9.4)/87(90.6)      | 0.084            |
| Antiviral (Yes/No)(%)                           | 41(21.4)/151(78.6)     | 24(25.0)/72(75.0)    | 0.584            |
| Tbi(mean, $\mu$ mol/L)                          | 14.17(7.84)            | 13.71(5.79)          | 0.612            |
| Alb(mean, g/L)                                  | 40.94(4.03)            | 41.43(4.01)          | 0.324            |
| ALT(mean, U/L)                                  | 43.25(34.74)           | 39.97(38.13)         | 0.466            |
| AST(mean, U/L)                                  | 38.95(25.08)           | 39.66(25.43)         | 0.821            |
| GGT(mean, U/L)                                  | 95.64(93.17)           | 82.39(103.12)        | 0.273            |
| ALP(mean, U/L)                                  | 91.48(40.20)           | 91.98(41.06)         | 0.922            |
| AFP(mean, ng/ml)                                | 424.21(946.56)         | 609.74(1438.05)      | 0.192            |
| HBsAg(Positive/Negative)(%)                     | 167(87.0)/25(13.0)     | 85(88.5)/11(11.5)    | 0.850            |
| HBVDNA( $\geq$ 2000/ $<$ 2000 IU/ml)(%)         | 85(44.3)/107(55.7)     | 45(46.9)/51(53.1)    | 0.769            |
| Type of resection (Nonanatomical/anatomical)(%) | 103(53.6)/89(46.4)     | 56(58.3)/40(41.7)    | 0.530            |
| Surgical margin ( $<$ 1/ $\geq$ 1cm)(%)         | 80 ( 41.7) / 112(58.3) | 56(58.3)/40(41.7)    | 0.705            |
| Hilar clamping time (mean, minites)             | 16.71(10.06)           | 14.88(10.16)         | 0.147            |
| Tumor size(mean, cm)                            | 5.60(3.76)             | 4.66(3.15)           | <b>0.036</b>     |
| Tumor Number ( $>$ 1/1)(%)                      | 14(7.3)/178(92.7)      | 4(4.2)/92 (95.8)     | 0.439            |
| Satellite nodules (presence/absence)(%)         | 15(7.8)/177(92.2)      | 4(4.2)/92(95.8)      | 0.356            |
| Cirrhosis(Yes/No)(%)                            | 128(66.7)/64(33.3)     | 56(58.3)/40(41.7)    | 0.208            |
| Edmondson-Steiner grade III-IV/I-II(%)          | 138(71.9)/54(28.1)     | 65(67.7)/31(32.3)    | 0.553            |
| MVI (Yes/No)(%)                                 | 14(7.3)/178(92.7)      | 2(2.1)/94(97.9)      | 0.122            |
| BCLC stage ( A-B/0)(%)                          | 190(99.0)/2(1.0)       | 88(91.7)/8(8.3)      | <b>0.004</b>     |

Bold values indicate statistical significance ( $P < 0.05$ ).  $P$  values male versus female cohort.

HCC, hepatocellular carcinoma; Tbi, total bilirubin; Alb, albumin; ALT, alanine transaminase; AST, aspartate aminotransferase; GGT,  $\gamma$ -glutamyl transferase; ALP, alkaline phosphatase; AFP indicates  $\alpha$ -fetoprotein; MVI, microvascular invasion; BCLC, Barcelona Clinic Liver Cancer.

**Supplementary Table 6. Univariate and multivariate analysis of OS and RFS in the intermediate group matched male patients with HCC after PSM.**

| Features                                        | OS    |           |                  | RFS   |           |                  |
|-------------------------------------------------|-------|-----------|------------------|-------|-----------|------------------|
|                                                 | HR    | 95%CI     | P-value          | HR    | 95%CI     | P-value          |
| <b>Univariate analysis</b>                      |       |           |                  |       |           |                  |
| Sex                                             | 0.750 | 0.48-1.15 | 0.187            | 0.790 | 0.56-1.12 | 0.188            |
| Age (mean, Years)                               | 0.960 | 0.9-1.03  | 0.248            | 1.010 | 0.95-1.07 | 0.825            |
| Cigarette smoking (Yes/No)(%)                   | 1.200 | 0.66-2.2  | 0.551            | 0.950 | 0.57-1.61 | 0.862            |
| Alcohol consumption (Yes/No)(%)                 | 1.300 | 0.77-2.19 | 0.323            | 1.060 | 0.68-1.66 | 0.785            |
| Diabetes mellitus (Yes/No)(%)                   | 0.290 | 0.07-1.17 | 0.082            | 1.080 | 0.55-2.13 | 0.813            |
| Antiviral (Yes/No)(%)                           | 0.650 | 0.39-1.1  | 0.109            | 0.770 | 0.52-1.15 | 0.203            |
| Tbi(mean, $\mu$ mol/L)                          | 1.010 | 1-1.03    | 0.103            | 1.010 | 0.98-1.03 | 0.554            |
| Alb(mean, g/L)                                  | 0.950 | 0.9-1     | <b>0.039</b>     | 0.960 | 0.92-1    | <b>0.033</b>     |
| ALT(mean, U/L)                                  | 1.010 | 1-1.01    | <b>&lt;0.001</b> | 1.000 | 1-1.01    | <b>0.026</b>     |
| AST(mean, U/L)                                  | 1.010 | 1.01-1.02 | <b>&lt;0.001</b> | 1.010 | 1.01-1.02 | <b>&lt;0.001</b> |
| GGT(mean, U/L)                                  | 1.000 | 1-1.01    | <b>&lt;0.001</b> | 1.000 | 1-1.00    | <b>0.005</b>     |
| ALP(mean, U/L)                                  | 1.010 | 1-1.01    | <b>&lt;0.001</b> | 1.010 | 1-1.01    | <b>&lt;0.001</b> |
| AFP(mean, ng/ml)                                | 1.000 | 1-1.00    | 0.432            | 1.000 | 1-1.00    | 0.179            |
| HBsAg(Positive/Negative)(%)                     | 1.450 | 0.75-2.79 | 0.264            | 1.280 | 0.78-2.1  | 0.330            |
| HBVDNA( $\geq$ 2000/ $<$ 2000 IU/ml)(%)         | 1.680 | 1.13-2.49 | <b>0.010</b>     | 1.360 | 0.99-1.87 | 0.060            |
| Type of resection (Nonanatomical/anatomical)(%) | 1.380 | 0.92-2.06 | 0.116            | 1.200 | 0.87-1.66 | 0.273            |
| Surgical margin ( $<$ 1/ $\geq$ 1cm)(%)         | 0.780 | 0.53-1.17 | 0.235            | 1.210 | 0.88-1.68 | 0.236            |
| Hilar clamping time (mean, minutes)             | 1.020 | 1-1.03    | 0.066            | 1.020 | 1-1.03    | <b>0.042</b>     |
| Tumor size(mean, cm)                            | 1.120 | 1.07-1.16 | <b>&lt;0.001</b> | 1.090 | 1.05-1.14 | <b>&lt;0.001</b> |
| Tumor Number ( $>$ 1/1)(%)                      | 2.360 | 1.23-4.55 | <b>0.010</b>     | 2.030 | 1.14-3.59 | <b>0.015</b>     |
| Satellite nodules (presence/absence)(%)         | 2.110 | 1.1-4.06  | <b>0.025</b>     | 1.940 | 1.12-3.38 | <b>0.018</b>     |
| Cirrhosis(Yes/No)(%)                            | 0.930 | 0.62-1.39 | 0.725            | 0.990 | 0.71-1.39 | 0.970            |
| Edmondson-Steiner grade III-IV/I-II(%)          | 3.610 | 2.01-6.46 | <b>&lt;0.001</b> | 1.510 | 1.05-2.16 | <b>0.025</b>     |
| MVI (Yes/No)(%)                                 | 2.570 | 1.37-4.82 | <b>0.003</b>     | 1.170 | 0.57-2.38 | 0.674            |
| <b>Multivariate analysis</b>                    |       |           |                  |       |           |                  |
| AST(mean, U/L)                                  |       |           |                  | 1.010 | 1-1.02    | <b>0.020</b>     |
| GGT(mean, U/L)                                  | 1.000 | 1-1.01    | <b>0.008</b>     |       |           |                  |
| Edmondson-Steiner grade III-IV/I-II(%)          | 2.530 | 1.38-4.62 | <b>0.003</b>     |       |           |                  |
| Tumor size(mean, cm)                            | 1.100 | 1.04-1.16 | <b>&lt;0.001</b> | 1.060 | 1.01-1.11 | <b>0.016</b>     |

Bold values indicate statistical significance ( $P < 0.05$ ).

HCC, hepatocellular carcinoma; Tbi, total bilirubin; Alb, albumin; ALT, alanine transaminase; AST, aspartate aminotransferase; GGT,  $\gamma$ -glutamyl transferase; ALP, alkaline phosphatase; AFP indicates  $\alpha$ -fetoprotein; MVI, microvascular invasion; BCLC, Barcelona Clinic Liver Cancer; OS, overall survival; RFS, recurrence-free survival; CI, confidence interval; HR, hazard ratio.
